# Supplementary material
Source: PubMed Central journal article supplement (PMC4519398)
Supplement: NIHMS690591-supplement-Supp_Material.pdf [file NIHMS690591-supplement-Supp_Material.pdf]

**SUPPLEMENTARY MATERIAL**

**SUPPLEMENTARY TABLE 1** Study subject characteristics

|                                            | <b>GPA<br/>n=32</b> | <b>Comparators<br/>n=35</b> | <b>P Value</b> |
|--------------------------------------------|---------------------|-----------------------------|----------------|
| Mean age (sd)                              | 52 (15.2)           | 51 (13.3)                   | 0.89           |
| Never smoker (%)                           | 18 (56)             | 25 (71)                     | 0.20           |
| Pack Years Among Smokers                   | 35.5 (30.9)         | 26.3 (10.2)                 | 0.22           |
| Female Sex (%)                             | 17 (44)             | 16 (46)                     | 0.63           |
| Caucasian Race (%)                         | 31 (97)             | 31 (89)                     | 0.36           |
| Non-Hispanic (%)                           | 31 (97)             | 34 (97)                     | 1.00           |
| No. taking oral prednisone (%)             | 16 (50)             | 8 (23)                      | 0.02           |
| Mean prednisone dose, mg (sd)              | 18 (18.1)           | 13 (5.9)                    | 0.32           |
| No. taking other immunosuppressants (%)    | 19 (59)             | 7 (20)                      | <0.01          |
| Azathioprine                               | 4 (13)              | 0 (0)                       |                |
| Cyclophosphamide                           | 1 (3)               | 1 (3)                       |                |
| Infliximab                                 | 0 (0)               | 1 (3)                       |                |
| Methotrexate                               | 8 (28)              | 4 (11)                      |                |
| Mycophenolate mofetil                      | 2 (6)               | 0 (0)                       |                |
| Rituximab                                  | 4 (14)              | 1 (3)                       |                |
| No. using nasal glucocorticoids (%)        | 3 (10)              | 7 (20)                      | 0.31           |
| No. taking trimethoprim – sulfamethoxazole | 5 (16)              | 4 (11)                      | 0.73           |

**SUPPLEMENTARY TABLE 2:** Differential expression of 393 probesets between GPA and Composite Controls

| Gene Symbol | Gene                                                  | RefSeq    | Fold Change | P-value    | Description       |
|-------------|-------------------------------------------------------|-----------|-------------|------------|-------------------|
| TREM1       | Triggering receptor expressed on myeloid cells 1      | AF287008  | 3.06552     | 0.00048474 | GPA up vs Control |
| AQP9        | Aquaporin 9                                           | AF016495  | 3.01925     | 0.00121312 | GPA up vs Control |
| CXCR1       | Chemokine (C-X-C motif) receptor 1                    | L19591    | 3.01883     | 0.00111175 | GPA up vs Control |
| IL1B        | Interleukin 1, beta                                   | BC008678  | 2.96958     | 0.00142907 | GPA up vs Control |
| IL1R2       | Interleukin 1 receptor, type II                       | BC039031  | 2.89644     | 0.00024234 | GPA up vs Control |
|             | ---                                                   | ---       | 2.85894     | 0.00112395 | GPA up vs Control |
| HBB         | Hemoglobin, beta                                      | AF117710  | 2.76585     | 0.00939599 | GPA up vs Control |
| FCGR2A      | Fc fragment of IgG, low affinity IIa, receptor (CD32) | BC020823  | 2.74263     | 0.00053416 | GPA up vs Control |
| CXCR2       | Chemokine (C-X-C motif) receptor 2                    | L19593    | 2.70292     | 0.00058137 | GPA up vs Control |
| FPR2        | Formyl peptide receptor 2                             | BC071722  | 2.57247     | 0.00251085 | GPA up vs Control |
| CSF3R       | Colony stimulating factor 3 receptor (granulocyte)    | BC053585  | 2.55924     | 0.00087965 | GPA up vs Control |
| KIAA0226L   | KIAA0226-like                                         | AK093073  | 2.46839     | 0.0005981  | GPA up vs Control |
| SLC11A1     | Solute carrier family 11                              | AK303398  | 2.46742     | 0.00019036 | GPA up vs Control |
|             | ---                                                   | ---       | 2.44756     | 0.00250453 | GPA up vs Control |
| OSM         | Oncostatin M                                          | BC011589  | 2.41978     | 0.00094466 | GPA up vs Control |
| FPR1        | Formyl peptide receptor 1                             | BC005315  | 2.40944     | 0.0015801  | GPA up vs Control |
| GLT1D1      | Glycosyltransferase 1 domain containing 1             | BC043528  | 2.39423     | 0.00082949 | GPA up vs Control |
| RGS2        | Regulator of G-protein signaling 2                    | BC042755  | 2.3878      | 0.00111032 | GPA up vs Control |
| PLEK        | Pleckstrin                                            | BC018549  | 2.37436     | 0.00334781 | GPA up vs Control |
| HCAR3       | Hydroxycarboxylic acid receptor 3                     | BC047891  | 2.34051     | 0.00137764 | GPA up vs Control |
| THBS1       | Thrombospondin 1                                      | AK291639  | 2.32522     | 0.0000149  | GPA up vs Control |
| IL18RAP     | Interleukin 18 receptor accessory protein             | AF077346  | 2.32289     | 0.00323212 | GPA up vs Control |
| HBA1        | Hemoglobin, alpha 1                                   | AF097635  | 2.32283     | 0.00623074 | GPA up vs Control |
| HBA1        | Hemoglobin, alpha 1                                   | AF097635  | 2.32283     | 0.00623074 | GPA up vs Control |
| MIR223      | microRNA 223                                          | NR_029637 | 2.32129     | 0.00088761 | GPA up vs Control |
| EMR3        | Egf-like module containing hormone receptor-like 3    | AF239764  | 2.29987     | 0.00073522 | GPA up vs Control |

|           |                                                         |           |         |            |                   |
|-----------|---------------------------------------------------------|-----------|---------|------------|-------------------|
| SLC2A3    | Solute carrier family 2                                 | AB209607  | 2.28767 | 0.0021073  | GPA up vs Control |
| SPP1      | Secreted phosphoprotein 1                               | AF052124  | 2.28442 | 0.0000504  | GPA up vs Control |
| MME       | Membrane metallo-endopeptidase                          | J03779    | 2.27572 | 0.00086981 | GPA up vs Control |
|           | ---                                                     | ---       | 2.27116 | 0.00089378 | GPA up vs Control |
| LIPN      | Lipase, family member N                                 | EF426483  | 2.26361 | 0.00184658 | GPA up vs Control |
| SRGN      | Serglycin                                               | BC015516  | 2.26311 | 0.00186479 | GPA up vs Control |
| FCGR3A    | Fc fragment of IgG, low affinity IIIa, receptor (CD16a) | BC036723  | 2.25998 | 0.00268551 | GPA up vs Control |
| G0S2      | G0/G1switch 2                                           | BC009694  | 2.24181 | 0.00063228 | GPA up vs Control |
| S100A12   | S100 calcium binding protein A12                        | D83664    | 2.23561 | 0.00174056 | GPA up vs Control |
| FOS       | FBJ murine osteosarcoma viral oncogene homolog          | BC004490  | 2.22317 | 0.00129198 | GPA up vs Control |
| KLK6      | Kallikrein-related peptidase 6                          | U62801    | 2.20649 | 0.0014433  | GPA up vs Control |
| CLEC4E    | C-type lectin domain family 4, member E                 | AB024718  | 2.20571 | 0.00371247 | GPA up vs Control |
| SPRR1B    | Small proline-rich protein 1B                           | BC056240  | 2.20485 | 0.0000355  | GPA up vs Control |
| FAM65B    | Family with sequence similarity 65, member B            | AK299047  | 2.20261 | 0.00091136 | GPA up vs Control |
| MMP9      | Matrix metallopeptidase 9                               | BC006093  | 2.1954  | 0.00019891 | GPA up vs Control |
| MNDA      | Myeloid cell nuclear differentiation antigen            | M81750    | 2.18614 | 0.00221174 | GPA up vs Control |
| BCL2A1    | BCL2-related protein A1                                 | ENST00000 | 2.18187 | 0.00140824 | GPA up vs Control |
| SPRR2E    | Small proline-rich protein 2E                           | ENST00000 | 2.15457 | 0.00666222 | GPA up vs Control |
| PTGS2     | Prostaglandin-endoperoxide synthase 2                   | AY151286  | 2.14945 | 0.00128781 | GPA up vs Control |
| ITGAX     | Integrin, alpha X                                       | M81695    | 2.13925 | 0.00097788 | GPA up vs Control |
| GPR97     | G protein-coupled receptor 97                           | BC064508  | 2.13847 | 0.00183756 | GPA up vs Control |
| FN1       | Fibronectin 1                                           | BX640731  | 2.131   | 0.00365524 | GPA up vs Control |
| CR1       | Complement component (3b/4b) receptor 1                 | ENST00000 | 2.12721 | 0.00165205 | GPA up vs Control |
|           | ---                                                     | ---       | 2.11604 | 0.00012755 | GPA up vs Control |
| PROK2     | Prokineticin 2                                          | AF333025  | 2.11138 | 0.00112293 | GPA up vs Control |
| CNFN      | Cornifelin                                              | BC101197  | 2.10261 | 0.00369525 | GPA up vs Control |
| CRCT1     | Cysteine-rich C-terminal 1                              | ENST00000 | 2.09534 | 0.00620858 | GPA up vs Control |
| CYTIP     | Cytohesin 1 interacting protein                         | BC036449  | 2.08535 | 0.00153054 | GPA up vs Control |
| TMPRSS11E | Transmembrane protease, serine 11E                      | AY359017  | 2.07141 | 0.00081886 | GPA up vs Control |
| SLA       | Src-like-adaptor                                        | D89077    | 2.06939 | 0.00138836 | GPA up vs Control |

|           |                                                           |            |         |            |                   |
|-----------|-----------------------------------------------------------|------------|---------|------------|-------------------|
|           | ---                                                       | ---        | 2.05919 | 0.00310844 | GPA up vs Control |
| TMPRSS11E | Transmembrane protease, serine 11E                        | AY359017   | 2.05663 | 0.00085387 | GPA up vs Control |
| MAL       | Mal, T-cell differentiation protein                       | BC003006   | 2.05479 | 0.00053901 | GPA up vs Control |
|           | ---                                                       | ---        | 2.05239 | 0.00175075 | GPA up vs Control |
| EMR2      | Egf-like module containing hormone receptor-like 2        | AK291776   | 2.05204 | 0.00171438 | GPA up vs Control |
|           | ---                                                       | ---        | 2.03238 | 0.00367012 | GPA up vs Control |
| IL8       | Interleukin 8                                             | M17017     | 2.0156  | 0.00084768 | GPA up vs Control |
|           | ---                                                       | ---        | 2.01429 | 0.00264935 | GPA up vs Control |
| SAMSN1    | SAM domain, SH3 domain & nuclear localization signals 1   | AF218085   | 2.01328 | 0.00274896 | GPA up vs Control |
| RASSF2    | Ras association (RalGDS/AF-6) domain family member 2      | AY154470   | 2.01188 | 0.00066105 | GPA up vs Control |
| PFKFB3    | 6-phosphofructo-2-kinase/fructose-2,6-biphosphatase 3     | AF056320   | 2.01082 | 0.00033349 | GPA up vs Control |
| MYO1F     | Myosin IF                                                 | AB290178   | 1.99256 | 0.00118265 | GPA up vs Control |
| KRT6B     | Keratin 6B                                                | BC034535   | 1.98834 | 0.00047495 | GPA up vs Control |
|           | ---                                                       | ---        | 1.98345 | 0.00229994 | GPA up vs Control |
| PLAUR     | Plasminogen activator, urokinase receptor                 | BC002788   | 1.97838 | 0.00052354 | GPA up vs Control |
| SELL      | Selectin L                                                | M25280     | 1.97692 | 0.00209312 | GPA up vs Control |
| HCAR2     | Hydroxycarboxylic acid receptor 2                         | BC027965   | 1.97604 | 0.0017266  | GPA up vs Control |
| MIR24-2   | MicroRNA 24-2                                             | AF480559   | 1.97329 | 0.00078486 | GPA up vs Control |
| KRT6A     | Keratin 6A                                                | BC008807   | 1.96548 | 0.00124853 | GPA up vs Control |
| TMPRSS11B | Transmembrane protease, serine 11B                        | BX537945   | 1.96379 | 0.00639297 | GPA up vs Control |
| KRT14     | Keratin 14                                                | BC094830   | 1.96353 | 0.0001649  | GPA up vs Control |
| OLR1      | Oxidized low density lipoprotein (lectin-like) receptor 1 | AB010710   | 1.96011 | 0.00012475 | GPA up vs Control |
| CSF2RB    | Colony stimulating factor 2 receptor, beta                | BC070085   | 1.95743 | 0.00304181 | GPA up vs Control |
| GMFG      | Glia maturation factor, gamma                             | BC093799   | 1.95562 | 0.00159091 | GPA up vs Control |
| CD53      | CD53 molecule                                             | BC040693   | 1.95227 | 0.00165007 | GPA up vs Control |
| UCA1      | Urothelial cancer associated 1                            | DQ249310   | 1.94506 | 0.00189443 | GPA up vs Control |
| TNFAIP6   | Tumor necrosis factor, alpha-induced protein 6            | BC030205   | 1.94485 | 0.00542385 | GPA up vs Control |
| DYSF      | Dysferlin, limb girdle muscular dystrophy 2B              | ENST000000 | 1.94044 | 0.0024163  | GPA up vs Control |
| CYTH4     | Cytohesin 4                                               | AF075458   | 1.93875 | 0.00257567 | GPA up vs Control |
| EVI2B     | Ecotropic viral integration site 2B                       | BC005926   | 1.93091 | 0.00115885 | GPA up vs Control |

|           |                                                        |            |         |            |                   |
|-----------|--------------------------------------------------------|------------|---------|------------|-------------------|
| CD14      | CD14 molecule                                          | BC010507   | 1.92962 | 0.00013878 | GPA up vs Control |
| SERPINA1  | Serpin peptidase inhibitor, clade A                    | BC011991   | 1.92944 | 0.00015486 | GPA up vs Control |
| SPRR2A    | Small proline-rich protein 2A                          | ENST000000 | 1.92929 | 0.00346716 | GPA up vs Control |
| LCP2      | Lymphocyte cytosolic protein 2                         | AK292890   | 1.92244 | 0.00397874 | GPA up vs Control |
| LILRB3    | Leukocyte immunoglobulin-like receptor, subfamily B    | ENST000000 | 1.9178  | 0.00097895 | GPA up vs Control |
| LILRA2    | Leukocyte immunoglobulin-like receptor, subfamily A    | AF025531   | 1.90419 | 0.00033192 | GPA up vs Control |
| PTPRC     | Protein tyrosine phosphatase, receptor type, C         | AK292131   | 1.90226 | 0.00675586 | GPA up vs Control |
|           | ---                                                    | ---        | 1.89184 | 0.00710071 | GPA up vs Control |
|           | ---                                                    | ---        | 1.88846 | 0.00402724 | GPA up vs Control |
| TLR4      | Toll-like receptor 4                                   | AK290053   | 1.88677 | 0.00252052 | GPA up vs Control |
|           | ---                                                    | ---        | 1.88643 | 0.00157351 | GPA up vs Control |
| SOCS3     | Suppressor of cytokine signaling 3                     | BC060858   | 1.88435 | 0.00274495 | GPA up vs Control |
|           | ---                                                    | ---        | 1.87967 | 0.00088472 | GPA up vs Control |
| NCF4      | Neutrophil cytosolic factor 4                          | BC002798   | 1.87904 | 0.00092365 | GPA up vs Control |
| S100A8    | S100 calcium binding protein A8                        | BC005928   | 1.87782 | 0.00047079 | GPA up vs Control |
| FCAR      | Fc fragment of IgA, receptor for                       | ENST000000 | 1.87551 | 0.00107063 | GPA up vs Control |
| HSPB8     | Heat shock 22kDa protein 8                             | AF191017   | 1.86963 | 0.00067867 | GPA up vs Control |
| S100A9    | S100 calcium binding protein A9                        | M26311     | 1.86687 | 0.00071477 | GPA up vs Control |
| TNFRSF10C | Tumor necrosis factor receptor superfamily, member 10c | ENST000000 | 1.86225 | 0.00056857 | GPA up vs Control |
| SLC34A2   | Solute carrier family 34 (sodium phosphate), member 2  | AF111856   | 1.85855 | 0.00066228 | GPA up vs Control |
| LAPTM5    | Lysosomal protein transmembrane 5                      | U51240     | 1.85281 | 0.00050072 | GPA up vs Control |
| LCP1      | Lymphocyte cytosolic protein 1 (L-plastin)             | BC007673   | 1.85125 | 0.0048354  | GPA up vs Control |
| HCK       | Hemopoietic cell kinase                                | AK290928   | 1.84852 | 0.00269689 | GPA up vs Control |
| CXCR4     | Chemokine (C-X-C motif) receptor 4                     | AF147204   | 1.84451 | 0.00069498 | GPA up vs Control |
| PLXNC1    | Plexin C1                                              | AF030339   | 1.84201 | 0.00190593 | GPA up vs Control |
| TNFRSF1B  | Tumor necrosis factor receptor superfamily, member 1B  | BC052977   | 1.83856 | 0.00171559 | GPA up vs Control |
|           | ---                                                    | ---        | 1.83086 | 0.00268534 | GPA up vs Control |
| CASS4     | Cas scaffolding protein family member 4                | BC027951   | 1.82521 | 0.00101291 | GPA up vs Control |
| MXD1      | MAX dimerization protein 1                             | BC098396   | 1.82458 | 0.00027245 | GPA up vs Control |
| KRT13     | Keratin 13                                             | AK223077   | 1.82421 | 0.0002193  | GPA up vs Control |

|              |                                                           |            |         |            |                   |
|--------------|-----------------------------------------------------------|------------|---------|------------|-------------------|
| CHI3L1       | Chitinase 3-like 1 (cartilage glycoprotein-39)            | BC008568   | 1.82188 | 0.00147555 | GPA up vs Control |
| THBD         | Thrombomodulin                                            | BC035602   | 1.81949 | 0.0000838  | GPA up vs Control |
| FOSB         | FBJ murine osteosarcoma viral oncogene homolog B          | BC036724   | 1.81469 | 0.00021103 | GPA up vs Control |
| ALOX5        | Arachidonate 5-lipoxygenase                               | J03571     | 1.81412 | 0.0000893  | GPA up vs Control |
| ALOX5AP      | Arachidonate 5-lipoxygenase-activating protein            | BC018538   | 1.80988 | 0.0017092  | GPA up vs Control |
| LOC100131131 | LOC100131131                                              | AY358263   | 1.80586 | 0.00243492 | GPA up vs Control |
| GAGE10       | G antigen 10                                              | ENST000000 | 1.79801 | 0.00386896 | GPA up vs Control |
| SPARC        | Secreted protein, acidic, cysteine-rich (osteonectin)     | BC072457   | 1.79716 | 0.00017559 | GPA up vs Control |
| MPP1         | Membrane protein, palmitoylated 1                         | M64925     | 1.79504 | 0.00014825 | GPA up vs Control |
| DSC2         | Desmocollin 2                                             | BC063291   | 1.79403 | 0.0000287  | GPA up vs Control |
| NCF2         | Neutrophil cytosolic factor 2                             | BC001606   | 1.79395 | 0.00070807 | GPA up vs Control |
| LOC401317    | Uncharacterized LOC401317                                 | ENST000000 | 1.79256 | 0.0010677  | GPA up vs Control |
| CD93         | CD93 molecule                                             | U94333     | 1.79131 | 0.0004962  | GPA up vs Control |
| SPRR2D       | Small proline-rich protein 2D                             | M21302     | 1.79034 | 0.00331273 | GPA up vs Control |
| ---          | ---                                                       | ---        | 1.78666 | 0.00632296 | GPA up vs Control |
| ---          | ---                                                       | ---        | 1.78563 | 0.00283279 | GPA up vs Control |
| APOBEC3A     | Apolipoprotein B mRNA editing enzyme                      | U03891     | 1.78532 | 0.00253913 | GPA up vs Control |
| ITGB2        | Integrin, beta 2                                          | AB208909   | 1.78504 | 0.00088092 | GPA up vs Control |
| HSPA6        | Heat shock 70kDa protein 6 (HSP70B')                      | BC035665   | 1.78284 | 0.00134575 | GPA up vs Control |
| GPR65        | G protein-coupled receptor 65                             | BC035633   | 1.77193 | 0.00313079 | GPA up vs Control |
| PRKCB        | Protein kinase C, beta                                    | BC036472   | 1.76794 | 0.00163975 | GPA up vs Control |
| PLK3         | Polo-like kinase 3                                        | AJ293866   | 1.76788 | 0.00025162 | GPA up vs Control |
| C1orf38      | Chromosome 1 open reading frame 38                        | AK303090   | 1.76093 | 0.001556   | GPA up vs Control |
| PREX1        | Phosphatidylinositol-3,4,5-trisphosphate-depend Rac       | ENST000000 | 1.75971 | 0.00290629 | GPA up vs Control |
| FCGR2B       | Fc fragment of IgG, low affinity IIb, receptor (CD32)     | BC146678   | 1.75906 | 0.00058849 | GPA up vs Control |
| SPRR2B       | Small proline-rich protein 2B                             | ENST000000 | 1.75732 | 0.00901984 | GPA up vs Control |
| FGR          | Gardner-Rasheed feline sarcoma viral oncogene homolog     | AK301078   | 1.75508 | 0.00158326 | GPA up vs Control |
| JUNB         | Jun B proto-oncogene                                      | BC004250   | 1.75354 | 0.00042969 | GPA up vs Control |
| FCER1G       | Fc fragment of IgE, high affinity I, Rc; gamma polypeptid | M33195     | 1.75353 | 0.00463284 | GPA up vs Control |
| SPRR1A       | Small proline-rich protein 1A                             | BC105081   | 1.75129 | 0.00071351 | GPA up vs Control |

|         |                                                             |          |         |            |                   |
|---------|-------------------------------------------------------------|----------|---------|------------|-------------------|
| EMP1    | Epithelial membrane protein 1                               | AK299388 | 1.7493  | 0.00128758 | GPA up vs Control |
| KLK7    | Kallikrein-related peptidase 7                              | AF411214 | 1.74752 | 0.00179571 | GPA up vs Control |
| APBB1IP | Amyloid beta precursor protein-binding fam B member 1       | AK303597 | 1.74638 | 0.00376421 | GPA up vs Control |
| IL1RN   | Interleukin 1 receptor antagonist                           | BC068441 | 1.74434 | 0.00043221 | GPA up vs Control |
| SKAP2   | Src kinase associated phosphoprotein 2                      | AB014486 | 1.74347 | 0.00242838 | GPA up vs Control |
| TYROBP  | TYRO protein tyrosine kinase binding protein                | BC011175 | 1.74263 | 0.00023623 | GPA up vs Control |
| SULT1B1 | Sulfotransferase family, cytosolic, 1B, member 1            | BC010895 | 1.74114 | 0.001034   | GPA up vs Control |
| SLED1   | Proteoglycan 3 pseudogene                                   | AY358224 | 1.7411  | 0.00281942 | GPA up vs Control |
| RAC2    | Ras-related C3 botulinum toxin substrate 2                  | BC001485 | 1.73912 | 0.00114643 | GPA up vs Control |
| ECM1    | Extracellular matrix protein 1                              | BC023505 | 1.73519 | 0.00121299 | GPA up vs Control |
| NABP1   | Nucleic acid binding protein 1                              | BC017114 | 1.73363 | 0.00228795 | GPA up vs Control |
| ITGAM   | Integrin, alpha M                                           | J03925   | 1.73145 | 0.00088861 | GPA up vs Control |
|         | ---                                                         | ---      | 1.7289  | 0.00127335 | GPA up vs Control |
| DSG3    | Desmoglein 3                                                | M76482   | 1.72852 | 0.00058758 | GPA up vs Control |
| RHCG    | Rh family, C glycoprotein                                   | AF081497 | 1.72734 | 0.00327557 | GPA up vs Control |
| FYB     | FYN binding protein                                         | AF001862 | 1.72482 | 0.00796855 | GPA up vs Control |
| PTPRE   | Protein tyrosine phosphatase, receptor type, E              | AJ430580 | 1.72278 | 0.00018425 | GPA up vs Control |
| C5AR1   | Complement component 5a receptor 1                          | BC008982 | 1.72183 | 0.00162364 | GPA up vs Control |
| KRT17   | Keratin 17                                                  | BC000159 | 1.71507 | 0.00147825 | GPA up vs Control |
| ITGA5   | Integrin, alpha 5 (fibronectin receptor, alpha polypeptide) | AK291570 | 1.71158 | 0.00030208 | GPA up vs Control |
| NLRP12  | NLR family, pyrin domain containing 12                      | AY095146 | 1.70701 | 0.0003834  | GPA up vs Control |
|         | ---                                                         | ---      | 1.70634 | 0.00229782 | GPA up vs Control |
|         | ---                                                         | ---      | 1.70554 | 0.00101483 | GPA up vs Control |
| ADM     | Adrenomedullin                                              | BC015961 | 1.70409 | 0.00172017 | GPA up vs Control |
|         | ---                                                         | ---      | 1.70389 | 0.0066684  | GPA up vs Control |
| NFIL3   | Nuclear factor, interleukin 3 regulated                     | U26173   | 1.70385 | 0.00151996 | GPA up vs Control |
| DGAT2   | Diacylglycerol O-acyltransferase 2                          | BC015234 | 1.69223 | 0.00025813 | GPA up vs Control |
| ZFP36   | Zinc finger protein 36, C3H type, homologue                 | M92843   | 1.68991 | 0.00084055 | GPA up vs Control |
| PILRA   | Paired immunoglobulin-like type 2 receptor alpha            | AF161080 | 1.6873  | 0.00046192 | GPA up vs Control |
|         | ---                                                         | ---      | 1.68259 | 0.00259528 | GPA up vs Control |

|          |                                                       |            |         |            |                   |
|----------|-------------------------------------------------------|------------|---------|------------|-------------------|
| BIN2     | Bridging integrator 2                                 | BC047686   | 1.68133 | 0.00106459 | GPA up vs Control |
| EREG     | Epiregulin                                            | D30783     | 1.6801  | 0.00072863 | GPA up vs Control |
| IL36A    | Interleukin 36, alpha                                 | AF201831   | 1.6795  | 0.00497803 | GPA up vs Control |
| BTG2     | BTG family, member 2                                  | U72649     | 1.67721 | 0.00294261 | GPA up vs Control |
| HRH2     | Histamine receptor H2                                 | BC054510   | 1.67632 | 0.00265973 | GPA up vs Control |
|          | ---                                                   | ---        | 1.67459 | 0.00559805 | GPA up vs Control |
| CDA      | Cytidine deaminase                                    | BC048284   | 1.67404 | 0.00041941 | GPA up vs Control |
| TMCC3    | Transmembrane and coiled-coil domain family 3         | BC040535   | 1.67333 | 0.0000657  | GPA up vs Control |
| C7orf53  | Chromosome 7 open reading frame 53                    | BC031976   | 1.67266 | 0.00148086 | GPA up vs Control |
| TLR8     | Toll-like receptor 8                                  | AF246971   | 1.67256 | 0.00583885 | GPA up vs Control |
| MEFV     | Mediterranean fever                                   | AF018080   | 1.67221 | 0.00728823 | GPA up vs Control |
| TLR2     | Toll-like receptor 2                                  | BC033756   | 1.66996 | 0.00228254 | GPA up vs Control |
| CCL4     | Chemokine (C-C motif) ligand 4                        | AY766446   | 1.66461 | 0.00336737 | GPA up vs Control |
| CCL4     | Chemokine (C-C motif) ligand 4                        | AY766446   | 1.66461 | 0.00336737 | GPA up vs Control |
|          | ---                                                   | ---        | 1.66247 | 0.00230352 | GPA up vs Control |
|          | ---                                                   | ---        | 1.65988 | 0.00012726 | GPA up vs Control |
| SPRR3    |                                                       | AY118269   | 1.6597  | 0.00054454 | GPA up vs Control |
| LYPD3    | LY6/PLAUR domain containing 3                         | AF082889   | 1.65734 | 0.00025461 | GPA up vs Control |
| EGR1     | Early growth response 1                               | M62829     | 1.65553 | 0.0057411  | GPA up vs Control |
| AREG     | Amphiregulin                                          | BC009799   | 1.65483 | 0.00075482 | GPA up vs Control |
| SLC25A37 | Solute carrier family 25                              | AK127666   | 1.65387 | 0.00055069 | GPA up vs Control |
| RASGRP4  | RAS guanyl releasing protein 4                        | AY048120   | 1.65283 | 0.0035318  | GPA up vs Control |
| CSRNP1   | Cysteine-serine-rich nuclear protein 1                | BC038949   | 1.65162 | 0.00154301 | GPA up vs Control |
| DOCK11   | Dedicator of cytokinesis 11                           | AY692226   | 1.65123 | 0.0026114  | GPA up vs Control |
| LILRA1   | Leukocyte immunoglobulin-like receptor, subfamily A   | AF025529   | 1.65079 | 0.00323277 | GPA up vs Control |
| SIGLEC9  | Sialic acid binding Ig-like lectin 9                  | BC035365   | 1.64965 | 0.0001121  | GPA up vs Control |
|          | ---                                                   | ---        | 1.64963 | 0.00304275 | GPA up vs Control |
| KRT17P1  | Keratin 17 pseudogene 1                               | ENST000000 | 1.64726 | 0.00176481 | GPA up vs Control |
| ICAM3    | Intercellular adhesion molecule 3                     | BC046121   | 1.64344 | 0.00426125 | GPA up vs Control |
| SPI1     | Spleen focus forming virus proviral integration oncog | ENST000000 | 1.64304 | 0.00195753 | GPA up vs Control |



|          |                                                     |          |         |            |                   |
|----------|-----------------------------------------------------|----------|---------|------------|-------------------|
| NLRP3    | NLR family, pyrin domain containing 3               | AF410477 | 1.64011 | 0.00135066 | GPA up vs Control |
| CHST11   | Carbohydrate (chondroitin 4) sulfotransferase 11    | AB042326 | 1.63892 | 0.00016909 | GPA up vs Control |
| EGR3     | Early growth response 3                             | AK292464 | 1.63716 | 0.00584418 | GPA up vs Control |
| SLC25A37 | Solute carrier family 25                            | AF495725 | 1.63296 | 0.00085102 | GPA up vs Control |
| CRNN     | Cornulin                                            | BC030807 | 1.63195 | 0.0103852  | GPA up vs Control |
| KRT16    | Keratin 16                                          | BC039169 | 1.63081 | 0.00049277 | GPA up vs Control |
| PDE4B    | Phosphodiesterase 4B, cAMP-specific                 | AK289969 | 1.62901 | 0.00549928 | GPA up vs Control |
|          | ---                                                 | ---      | 1.6272  | 0.0010111  | GPA up vs Control |
| IGSF6    | Immunoglobulin superfamily, member 6                | BC017844 | 1.62048 | 0.00371142 | GPA up vs Control |
| PLAT     | Plasminogen activator, tissue                       | BC095403 | 1.62045 | 0.00480707 | GPA up vs Control |
| TIMP2    | TIMP metalloproteinase inhibitor 2                  | BC040445 | 1.61716 | 6.95E-07   | GPA up vs Control |
| TGFB1    | Transforming growth factor, beta-induced            | AK094581 | 1.6169  | 0.0000352  | GPA up vs Control |
| LILRA5   | Leukocyte immunoglobulin-like receptor, subfamily A | AF324830 | 1.61645 | 0.0102124  | GPA up vs Control |
| SLC2A14  | Solute carrier family 2                             | AF481878 | 1.61619 | 0.00091603 | GPA up vs Control |
| TBXAS1   | Thromboxane A synthase 1 (platelet)                 | BC014117 | 1.61344 | 0.00150442 | GPA up vs Control |
| CD300A   | CD300a molecule                                     | BC032352 | 1.61111 | 0.00266351 | GPA up vs Control |
| CORO1A   | Coronin, actin binding protein, 1A                  | BC110374 | 1.60928 | 0.00330026 | GPA up vs Control |
| QPCT     | Glutaminyl-peptide cyclotransferase                 | BC047756 | 1.6085  | 0.00116851 | GPA up vs Control |
| ACSL1    | Acyl-CoA synthetase long-chain family member 1      | AK292798 | 1.60795 | 0.00148363 | GPA up vs Control |
| SELPLG   | Selectin P ligand                                   | BC029782 | 1.60751 | 0.0027976  | GPA up vs Control |
| BEST1    | Bestrophin 1                                        | AF057170 | 1.60677 | 0.00354645 | GPA up vs Control |
| CLEC7A   | C-type lectin domain family 7, member A             | AY359002 | 1.60646 | 0.0016778  | GPA up vs Control |
| CXCL13   | Chemokine (C-X-C motif) ligand 13                   | AF044197 | 1.60604 | 0.00256101 | GPA up vs Control |
| CLEC4D   | C-type lectin domain family 4, member D             | AY115592 | 1.6059  | 0.00432279 | GPA up vs Control |
| PIK3R5   | Phosphoinositide-3-kinase, regulatory subunit 5     | BC028212 | 1.60484 | 0.00086596 | GPA up vs Control |
| RGS18    | Regulator of G-protein signaling 18                 | AF268036 | 1.60328 | 0.00427967 | GPA up vs Control |
| KRT6A    | Keratin 6A                                          | BC008807 | 1.60251 | 0.00096498 | GPA up vs Control |
| ABCA1    | ATP-binding cassette, sub-family A (ABC1), member 1 | AF285167 | 1.60149 | 0.00039237 | GPA up vs Control |
| A2ML1    | Alpha-2-macroglobulin-like 1                        | AK122624 | 1.60101 | 0.001208   | GPA up vs Control |
| PLAU     | Plasminogen activator, urokinase                    | D00244   | 1.6006  | 0.00217778 | GPA up vs Control |

|              |                                                     |           |         |            |                   |
|--------------|-----------------------------------------------------|-----------|---------|------------|-------------------|
| LOC728093    | Putative POM121-like protein 1-like                 | AK296222  | 1.59767 | 0.00394026 | GPA up vs Control |
| LST1         | Leukocyte specific transcript 1                     | ENST00000 | 1.59701 | 0.00115077 | GPA up vs Control |
| LST1         | Leukocyte specific transcript 1                     | ENST00000 | 1.59701 | 0.00115077 | GPA up vs Control |
| LST1         | Leukocyte specific transcript 1                     | ENST00000 | 1.59701 | 0.00115077 | GPA up vs Control |
| IFITM2       | Interferon induced transmembrane protein 2          | BC009696  | 1.59591 | 0.00083249 | GPA up vs Control |
| LOC728093    | Putative POM121-like protein 1-like                 | AK296222  | 1.59196 | 0.0041585  | GPA up vs Control |
| NR4A3        | Nuclear receptor subfamily 4, group A, member 3     | D78579    | 1.59165 | 0.00138465 | GPA up vs Control |
| DOCK2        | Dedicator of cytokinesis 2                          | BC104900  | 1.58959 | 0.00367417 | GPA up vs Control |
| HAL          | Histidine ammonia-lyase                             | AK298736  | 1.58877 | 0.00357422 | GPA up vs Control |
| WIPF1        | WAS/WASL interacting protein family, member 1       | AK301271  | 1.58862 | 0.00612449 | GPA up vs Control |
| GPR77        | G protein-coupled receptor 77                       | AB038237  | 1.58703 | 0.00259791 | GPA up vs Control |
| MMP25        | Matrix metalloproteinase 25                         | AB042328  | 1.58477 | 0.00369054 | GPA up vs Control |
| LOC400499    | Uncharacterized LOC400499                           | AK126539  | 1.58382 | 0.00163477 | GPA up vs Control |
| MIR142       | MicroRNA 142                                        | NR_029683 | 1.58323 | 0.00971188 | GPA up vs Control |
| LUM          | Lumican                                             | BC007038  | 1.58081 | 0.0006828  | GPA up vs Control |
| FMNL1        | Formin-like 1                                       | AY278319  | 1.57955 | 0.00256687 | GPA up vs Control |
| KRT17        | Keratin 17                                          | BC011901  | 1.57805 | 0.00058249 | GPA up vs Control |
| OR2J3        | Olfactory receptor, family 2, subfamily J, member 3 | BC136973  | 1.57797 | 0.00205518 | GPA up vs Control |
| PHOSPHO1     | Phosphatase, orphan 1                               | ENST00000 | 1.57512 | 0.00405961 | GPA up vs Control |
| MIR27A       | MicroRNA 27a                                        | AF480561  | 1.57443 | 0.00014936 | GPA up vs Control |
| DUSP1        | Dual specificity phosphatase 1                      | BC022463  | 1.57128 | 0.00166594 | GPA up vs Control |
| C19orf59     | Chromosome 19 open reading frame 59                 | AF461155  | 1.56539 | 0.00100284 | GPA up vs Control |
| CD37         | CD37 molecule                                       | AK058093  | 1.56474 | 0.00426853 | GPA up vs Control |
| ADAM8        | ADAM metalloproteinase domain 8                     | AK301147  | 1.5643  | 0.00206758 | GPA up vs Control |
| NCCRP1       | Non-specific cytotoxic cell receptor protein 1      | BC092493  | 1.56266 | 0.00051413 | GPA up vs Control |
| IGKV1OR2-118 | Immunoglobulin kappa variable 1/OR2-118             | ENST00000 | 1.562   | 0.00044262 | GPA up vs Control |
|              | ---                                                 | ---       | 1.56184 | 0.0028425  | GPA up vs Control |
| SIGLEC5      | Sialic acid binding Ig-like lectin 5                | U71383    | 1.56159 | 0.00133935 | GPA up vs Control |
| C1orf138     | Chromosome 1 open reading frame 138                 | AK127688  | 1.56021 | 0.00135805 | GPA up vs Control |
| FERMT3       | Fermitin family member 3                            | BC004347  | 1.55956 | 0.00210236 | GPA up vs Control |

|              |                                                          |           |         |            |                   |
|--------------|----------------------------------------------------------|-----------|---------|------------|-------------------|
| HSPA6        | Heat shock 70kDa protein 6 (HSP70B')                     | BC035665  | 1.55858 | 0.00223921 | GPA up vs Control |
| PPIF         | Peptidylprolyl isomerase F                               | BC005020  | 1.55833 | 0.00045111 | GPA up vs Control |
| SOD2         | Superoxide dismutase 2, mitochondrial                    | BC012423  | 1.55446 | 0.00900189 | GPA up vs Control |
| ZDHC18       | Zinc finger, DHHC-type containing 18                     | BC066776  | 1.55141 | 0.00012637 | GPA up vs Control |
| ZEB2         | Zinc finger E-box binding homeobox 2                     | AB056507  | 1.55032 | 0.00283026 | GPA up vs Control |
| CCL24        | Chemokine (C-C motif) ligand 24                          | BC069072  | 1.55006 | 0.00000593 | GPA up vs Control |
| NAMPT        | Nicotinamide phosphoribosyltransferase                   | AK292851  | 1.54749 | 0.00143019 | GPA up vs Control |
| SSH2         | Slingshot homolog 2                                      | AB099290  | 1.54723 | 0.00212647 | GPA up vs Control |
| MIR23A       | MicroRNA 23a                                             | AF480558  | 1.54722 | 0.00097026 | GPA up vs Control |
| KLK10        | Kallikrein-related peptidase 10                          | BC002710  | 1.54384 | 0.00171691 | GPA up vs Control |
| ROCK1P1      | Rho-associated, coiled-coil containing protein kinase 1  | BC041849  | 1.54362 | 0.00168759 | GPA up vs Control |
| IL36G        | Interleukin 36, gamma                                    | AF206696  | 1.54257 | 0.00878002 | GPA up vs Control |
| ADAM19       | ADAM metallopeptidase domain 19                          | AF134707  | 1.53538 | 0.00120329 | GPA up vs Control |
| CHST15       | Carbohydrate sulfotransferase                            | AK294961  | 1.53526 | 0.0000885  | GPA up vs Control |
| CCL18        | Chemokine (C-C motif) ligand 18                          | AB000221  | 1.53496 | 0.00011087 | GPA up vs Control |
| C3AR1        | Complement component 3a receptor 1                       | U62027    | 1.53468 | 0.009914   | GPA up vs Control |
| TREML2       | Triggering receptor expressed on myeloid cells-like 2    | BC125078  | 1.53294 | 0.00609154 | GPA up vs Control |
| PLA2G7       | Phospholipase A2, group VII                              | BC038452  | 1.53224 | 0.0037343  | GPA up vs Control |
| OR4G2P       | Olfactory receptor, family 4, subfamily G, member 2      | ENST00000 | 1.53191 | 0.00130594 | GPA up vs Control |
| LILRB2       | Leukocyte immunoglobulin-like receptor, subfamily B      | AF004231  | 1.53163 | 0.00592015 | GPA up vs Control |
| SLC7A5       | Solute carrier family 7                                  | AF104032  | 1.5316  | 0.00092311 | GPA up vs Control |
| HBEGF        | Heparin-binding EGF-like growth factor                   | BC033097  | 1.5312  | 0.00615693 | GPA up vs Control |
| AREG         | Amphiregulin                                             | BC009799  | 1.53112 | 0.00105564 | GPA up vs Control |
| PRSS27       | Protease, serine 27                                      | BC034294  | 1.53031 | 0.00169771 | GPA up vs Control |
|              | ---                                                      | ---       | 1.52885 | 0.00527629 | GPA up vs Control |
| IGKV1OR2-118 | Immunoglobulin kappa variable 1/OR2-118                  | ENST00000 | 1.52834 | 0.00047804 | GPA up vs Control |
| CD109        | CD109 molecule                                           | ENST00000 | 1.5264  | 0.00067155 | GPA up vs Control |
| SLCO4A1      | Solute carrier organic anion transporter family, memb 4A | AF104334  | 1.52564 | 0.00299425 | GPA up vs Control |
| DEFA3        | Defensin, alpha 3, neutrophil-specific                   | BC119706  | 1.52479 | 0.00774627 | GPA up vs Control |
| DEFA3        | Defensin, alpha 3, neutrophil-specific                   | BC119706  | 1.52479 | 0.00774627 | GPA up vs Control |

|           |                                                         |           |         |            |                   |
|-----------|---------------------------------------------------------|-----------|---------|------------|-------------------|
| DEFA3     | Defensin, alpha 3, neutrophil-specific                  | BC119706  | 1.52479 | 0.00774627 | GPA up vs Control |
| FAM49A    | Family with sequence similarity 49, member A            | AL136704  | 1.52472 | 0.00305943 | GPA up vs Control |
| SCEL      | Sciellin                                                | AK301659  | 1.52458 | 0.00380027 | GPA up vs Control |
| LRMP      | Lymphoid-restricted membrane protein                    | BC126417  | 1.52423 | 0.00109945 | GPA up vs Control |
| EVI2A     | Ecotropic viral integration site 2A                     | AK295311  | 1.52374 | 0.00438421 | GPA up vs Control |
| HEPHL1    | Hephaestin-like 1                                       | ENST00000 | 1.52327 | 0.00122998 | GPA up vs Control |
| CCL3      | Chemokine (C-C motif) ligand 3                          | M23452    | 1.5197  | 0.00165335 | GPA up vs Control |
| OR4G2P    | Olfactory receptor, family 4, subfamily G, member 2     | ENST00000 | 1.51594 | 0.00162342 | GPA up vs Control |
| TRIB1     | Tribbles homolog 1                                      | BC063292  | 1.51569 | 0.00172164 | GPA up vs Control |
| LOC728093 | Putative POM121-like protein 1-like                     | AK296222  | 1.51564 | 0.00480556 | GPA up vs Control |
| COTL1     | Coactosin-like 1                                        | BC010039  | 1.51555 | 0.00111027 | GPA up vs Control |
| TM6SF1    | Transmembrane 6 superfamily member 1                    | AF255922  | 1.51512 | 0.00036478 | GPA up vs Control |
| PADI1     | Peptidyl arginine deiminase, type I                     | AB033768  | 1.51433 | 0.0000737  | GPA up vs Control |
| FLNA      | Filamin A, alpha                                        | GU727643  | 1.51299 | 0.001113   | GPA up vs Control |
| AIF1      | Allograft inflammatory factor 1                         | U95213    | 1.51298 | 0.00358603 | GPA up vs Control |
| AIF1      | Allograft inflammatory factor 1                         | U95213    | 1.51298 | 0.00358603 | GPA up vs Control |
| AIF1      | Allograft inflammatory factor 1                         | U95213    | 1.51298 | 0.00358603 | GPA up vs Control |
| FCGR3A    | Fc fragment of IgG, low affinity IIIa, receptor (CD16a) | BC036723  | 1.51261 | 0.00366065 | GPA up vs Control |
| NFE4      | Transcription factor NF-E4                              | AY258907  | 1.51216 | 0.00093699 | GPA up vs Control |
|           | ---                                                     | ---       | 1.51184 | 0.00349772 | GPA up vs Control |
|           | ---                                                     | ---       | 1.51184 | 0.00349772 | GPA up vs Control |
|           | ---                                                     | ---       | 1.51184 | 0.00349772 | GPA up vs Control |
|           | ---                                                     | ---       | 1.51184 | 0.00349772 | GPA up vs Control |
|           | ---                                                     | ---       | 1.51184 | 0.00349772 | GPA up vs Control |
|           | ---                                                     | ---       | 1.51163 | 0.00199704 | GPA up vs Control |
| IL10RA    | Interleukin 10 receptor, alpha                          | AK291645  | 1.51163 | 0.00199704 | GPA up vs Control |
| OR4G2P    | Olfactory receptor, family 4, subfamily G, member 2     | ENST00000 | 1.50868 | 0.00153405 | GPA up vs Control |
|           | ---                                                     | ---       | 1.50816 | 0.00254939 | GPA up vs Control |
| EGR2      | Early growth response 2                                 | BC035625  | 1.50719 | 0.00043572 | GPA up vs Control |
| NFE2      | Nuclear factor (erythroid-derived 2)                    | BC005044  | 1.50606 | 0.00407901 | GPA up vs Control |

|          |                                                       |           |          |            |                     |
|----------|-------------------------------------------------------|-----------|----------|------------|---------------------|
|          | ---                                                   | ---       | 1.50124  | 0.00310275 | GPA up vs Control   |
| DPEP2    | Dipeptidase 2                                         | AK092884  | 1.50049  | 0.00099243 | GPA up vs Control   |
| NAMPT    | Nicotinamide phosphoribosyltransferase                | AK292851  | 1.50032  | 0.00191901 | GPA up vs Control   |
| MAP9     | Microtubule-associated protein 9                      | BC146864  | -1.50446 | 0.00047938 | GPA down vs Control |
| PLCB4    | Phospholipase C, beta 4                               | AK122699  | -1.50538 | 0.00054408 | GPA down vs Control |
|          | ---                                                   | ---       | -1.51175 | 0.0003493  | GPA down vs Control |
| CCDC148  | Coiled-coil domain containing 148                     | BC107597  | -1.51201 | 0.00323504 | GPA down vs Control |
| C10orf67 | Chromosome 10 open reading frame 67                   | BC035732  | -1.51246 | 0.00203749 | GPA down vs Control |
| ADH1C    | Alcohol dehydrogenase 1C (class I), gamma polypeptide | BC062476  | -1.51325 | 0.00331531 | GPA down vs Control |
|          | ---                                                   | ---       | -1.51364 | 0.00042334 | GPA down vs Control |
| C11orf74 | Chromosome 11 open reading frame 74                   | AK290833  | -1.51409 | 0.00025939 | GPA down vs Control |
| IFT81    | Intraflagellar transport 81 homolog                   | AK291043  | -1.51578 | 0.00200741 | GPA down vs Control |
|          | ---                                                   | ---       | -1.51722 | 0.00075136 | GPA down vs Control |
|          | ---                                                   | ---       | -1.51779 | 0.00291369 | GPA down vs Control |
| RGS7BP   | Regulator of G-protein signaling 7 binding protein    | ENST00000 | -1.52789 | 0.00026536 | GPA down vs Control |
| WDR17    | WD repeat domain 17                                   | AF492460  | -1.52872 | 0.00246761 | GPA down vs Control |
| KIF21A   | Kinesin family member 21A                             | AY368076  | -1.52948 | 0.00093627 | GPA down vs Control |
| C8orf37  | Chromosome 8 open reading frame 37                    | BC036855  | -1.53052 | 0.00061594 | GPA down vs Control |
|          | ---                                                   | ---       | -1.53234 | 0.00058007 | GPA down vs Control |
|          | ---                                                   | ---       | -1.5348  | 0.00379364 | GPA down vs Control |
| TTC6     | Tetratricopeptide repeat domain 6                     | BC103914  | -1.53802 | 0.00015061 | GPA down vs Control |
| MSMO1    | Methylsterol monooxygenase 1                          | BC107879  | -1.5381  | 0.00040205 | GPA down vs Control |
| LRRC17   | Leucine rich repeat containing 17                     | U32907    | -1.54151 | 0.00000563 | GPA down vs Control |
| TEX9     | Testis expressed 9                                    | BC028119  | -1.54374 | 0.00609571 | GPA down vs Control |
| SLC9C2   | Solute carrier family 9, member C2                    | BC042592  | -1.54444 | 0.00762312 | GPA down vs Control |
| ANKRD45  | Ankyrin repeat domain 45                              | BC126353  | -1.5445  | 0.00361202 | GPA down vs Control |
| C2orf40  | Chromosome 2 open reading frame 40                    | AF325503  | -1.54487 | 0.00939148 | GPA down vs Control |
| CAPS2    | Calcyphosine 2                                        | AF251056  | -1.54727 | 0.00836881 | GPA down vs Control |
| PPP1R42  | Protein phosphatase 1, regulatory subunit 42          | BC055413  | -1.54981 | 0.00992998 | GPA down vs Control |
| LRRC49   | Leucine rich repeat containing 49                     | AK301971  | -1.54989 | 0.00689001 | GPA down vs Control |

|              |                                                            |            |          |            |                     |
|--------------|------------------------------------------------------------|------------|----------|------------|---------------------|
| CTNNAL1      | Catenin (cadherin-associated protein), alpha-like 1        | AK022834   | -1.55027 | 0.00039887 | GPA down vs Control |
| FOXP2        | Forkhead box P2                                            | AK296957   | -1.55248 | 0.00027727 | GPA down vs Control |
| CLDN22       | Claudin 22                                                 | AK303864   | -1.55432 | 0.0025418  | GPA down vs Control |
| PART1        | Prostate androgen-regulated transcript 1                   | NR_028509  | -1.55668 | 0.0003524  | GPA down vs Control |
|              | ---                                                        | ---        | -1.56079 | 0.00929975 | GPA down vs Control |
| FAM47E-STBD1 | FAM47E-STBD1 readthrough                                   | AK296418   | -1.56387 | 0.00664947 | GPA down vs Control |
| NOS2         | Nitric oxide synthase 2, inducible                         | AF068236   | -1.57433 | 0.00431696 | GPA down vs Control |
| EYA1         | Eyes absent homolog 1                                      | NM_000503  | -1.57522 | 0.00013261 | GPA down vs Control |
|              | ---                                                        | ---        | -1.58143 | 0.0000242  | GPA down vs Control |
| DYNLRB2      | Dynein, light chain, roadblock-type 2                      | BC054892   | -1.58421 | 0.00981259 | GPA down vs Control |
| CCDC67       | Coiled-coil domain containing 67                           | AK127973   | -1.58539 | 0.00113418 | GPA down vs Control |
| TEX26        | Testis expressed 26                                        | BC030277   | -1.58755 | 0.00554262 | GPA down vs Control |
| IRAK1BP1     | Interleukin-1 receptor-associated kinase 1 binding protein | BC112253   | -1.59597 | 0.0000644  | GPA down vs Control |
|              | ---                                                        | ---        | -1.59729 | 0.0006238  | GPA down vs Control |
| RPGRIP1L     | RPGRIP1-like                                               | BC136433   | -1.5993  | 0.0026692  | GPA down vs Control |
|              | ---                                                        | ---        | -1.59978 | 0.003208   | GPA down vs Control |
| ENPP5        | Ectonucleotide pyrophosphatase/phosphodiesterase 5         | BX647968   | -1.60552 | 0.0095529  | GPA down vs Control |
| IFT74        | Intraflagellar transport 74 homolog                        | AY040325   | -1.62152 | 0.00047702 | GPA down vs Control |
| TSGA10       | Testis specific, 10                                        | AF254756   | -1.62271 | 0.00113451 | GPA down vs Control |
| FMO6P        | Flavin containing monooxygenase 6 pseudogene               | ENST000003 | -1.62536 | 0.00022208 | GPA down vs Control |
| SERPINB10    | Serpin peptidase inhibitor, clade B (ovalbumin), member 10 | BC096217   | -1.62789 | 0.0045473  | GPA down vs Control |
| C14orf45     | Chromosome 14 open reading frame 45                        | AK097531   | -1.62952 | 0.00681647 | GPA down vs Control |
|              | ---                                                        | ---        | -1.63491 | 0.00112949 | GPA down vs Control |
|              | ---                                                        | ---        | -1.64663 | 0.00035407 | GPA down vs Control |
| UGT2B7       | UDP glucuronosyltransferase 2 family, polypeptide B7       | J05428     | -1.64954 | 0.00095556 | GPA down vs Control |
|              | ---                                                        | ---        | -1.65892 | 0.00611281 | GPA down vs Control |
|              | ---                                                        | ---        | -1.66261 | 0.00025303 | GPA down vs Control |
|              | ---                                                        | ---        | -1.66585 | 0.00072222 | GPA down vs Control |
| IL33         | Interleukin 33                                             | BC047085   | -1.68209 | 0.000036   | GPA down vs Control |
| C11orf70     | Chromosome 11 open reading frame 70                        | BC006128   | -1.68532 | 0.00875223 | GPA down vs Control |

|         |                                                      |          |     |          |            |                     |
|---------|------------------------------------------------------|----------|-----|----------|------------|---------------------|
|         | ---                                                  |          | --- | -1.70642 | 0.00116451 | GPA down vs Control |
|         | ---                                                  |          | --- | -1.74224 | 0.00538231 | GPA down vs Control |
| GALNT13 | UDP-N-acetyl-alpha-D-galactosamine                   | BC101031 |     | -1.79544 | 0.0000489  | GPA down vs Control |
| UGT2A1  | UDP glucuronosyltransferase 2 family, polypeptide A1 | AK304249 |     | -1.87412 | 0.00077936 | GPA down vs Control |
| SPARCL1 | SPARC-like 1 (hevin)                                 | AK294335 |     | -2.00026 | 0.0000041  | GPA down vs Control |
|         | ---                                                  |          | --- | -2.02177 | 4.57E-07   | GPA down vs Control |
| NTS     | Neurotensin                                          | BC010918 |     | -2.51019 | 0.0000762  | GPA down vs Control |

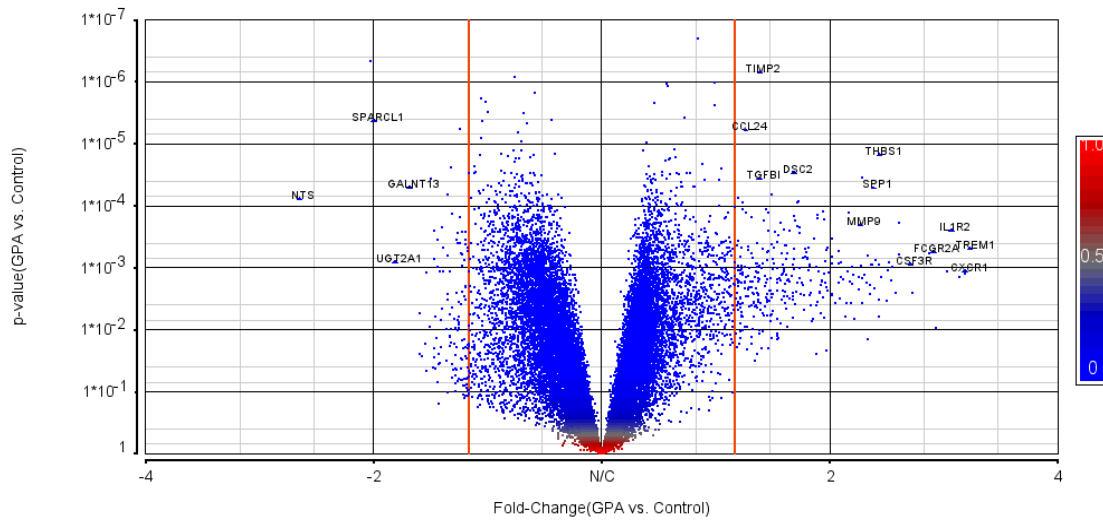

**SUPPLEMENTARY FIGURE 1** Volcano Plot of differentially expressed genes between patients with granulomatosis with polyangiitis and the composite comparator group. Statistical significance (p-value) is plotted against fold change. Differentially expressed genes are shown in blue ( $p < 0.05$ ), grey ( $p = 0.05$ ), or red ( $p > 0.05$ ). Orange vertical lines denote fold change cut-off of -1.5 and 1.5. Selected differentially expressed genes are labeled with their official gene symbol.



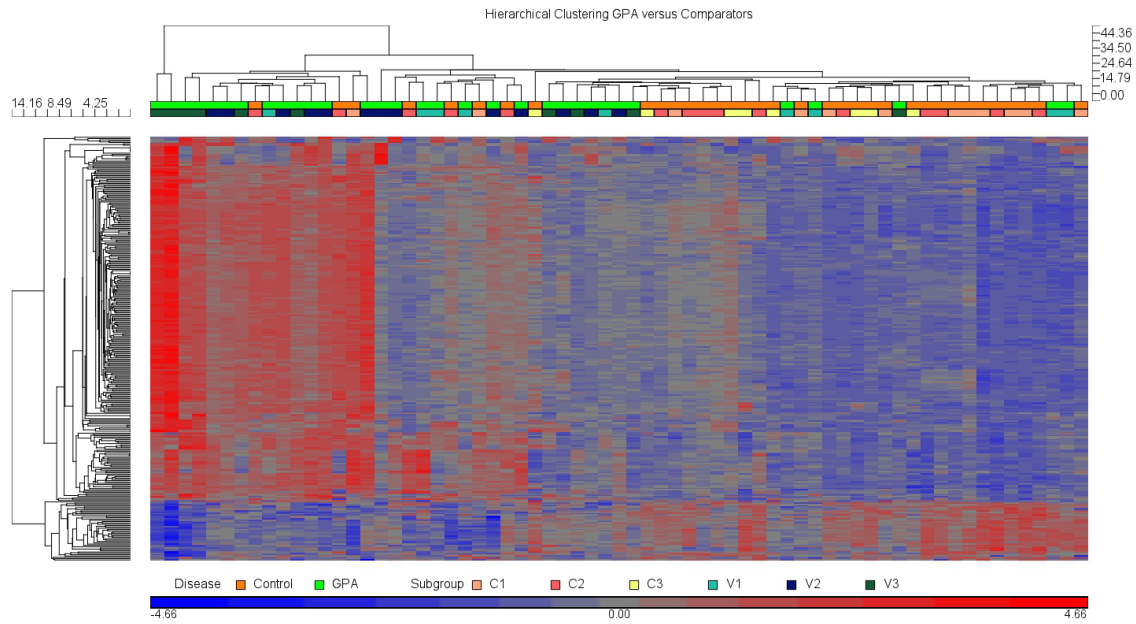

**SUPPLEMENTARY FIGURE 2** Heatmap depicting unsupervised clustering of 393 probes that were differentially expressed between granulomatosis with polyangiitis (GPA) and the composite comparator group (control) at absolute fold change  $> 1.5$  and false discovery rate  $< 0.05$ . Upregulated genes are depicted in red and downregulated genes are shown in blue. The double color bar at the top of the heatmap illustrates the disease status [GPA = green; control = orange] and the subgroup status [C1 = healthy control; C2 = sarcoidosis; C3 = allergic rhinitis; V1 = GPA with no prior nasal disease; V2 = GPA with prior nasal disease; V3 = GPA with active nasal disease]. The bottom color bar indicates the range of differential expression. These results reveal imperfect separation by disease and subgroup status based on unsupervised clustering of differentially expressed genes between patients with GPA and controls.

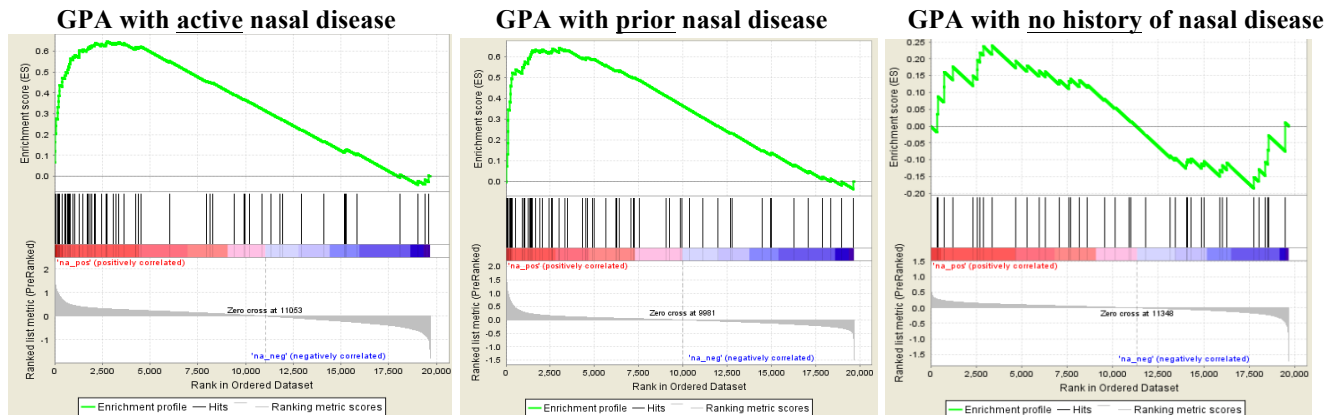

**SUPPLEMENTARY FIGURE 2:** Gene Set Enrichment Analysis (GSEA) was used to compare differentially expressed genes derived from nasal brushings to published transcriptomic data sets in GPA derived from blood. Two prior studies have examined whole-genome gene expression profiling in AAV compared to healthy controls using blood as the tissue source (Cheadle et al *A&R* 2010; Lyons et al *ARD* 2010). Both studies performed whole-genome microarray analysis on neutrophils and peripheral mononuclear blood cells (PBMCs) isolated by density gradient preparations. Significant enrichment of previously published neutrophil and PBMC gene expression signatures in GPA was observed in nasal mucosal gene expression signatures from patients with GPA with active or prior nasal disease ( $FDR_{GSEA} < 0.25$ ). Transcription signatures were not significantly enriched in the GPA group without a history of nasal disease. The figure depicts representative enrichment plots using PBMC signatures from the study by Cheadle et al. These findings suggest that peripheral blood neutrophil and mononuclear gene expression levels associated with GPA are similarly altered in the nasal gene expression profiles of patients with active or prior nasal disease which may reflect ongoing inflammation that isn't clinically apparent, infiltration of myeloid cells into remodeled tissue, or induction of these genes by epithelial cells.
